# Supplementary material for: Comprehensive Characterization of Secondary Metabolites in Fruits and Leaves of Cloudberry (Rubus chamaemorus L.)
Source: MDPI journal article supplement (doi:10.3390/metabo13050598), 2023-04-27
Supplement: s1 [file s1]

## Supplementary material

### Comprehensive Characterization of Secondary Metabolites in Fruits and Leaves of Cloudberry (*Rubus chamaemorus* L.)

Anna V. Faleva, Nikolay V. Ul'yanovskii\*, Aleksandra A. Onuchina, Danil I. Falev and Dmitry S. Kosyakov\*

Laboratory of Natural Compounds Chemistry and Bioanalytics, Core Facility Center "Arktika", M.V. Lomonosov Northern (Arctic) Federal University, Northern Dvina Emb. 17, 163002 Arkhangelsk, Russia;

\*Correspondence: n.ulyanovsky@narfu.ru (N.V.U.); d.kosyakov@narfu.ru (D.S.K.)

#### Contents:

**Figure S1.** A cloudberry (*Rubus chamaemorus* L.) plant at the collection site.

**Figure S2.** HPLC-HRMS chromatograms (total ion current) of the cloudberry leaf extract fractions F2-F4.

**Table S1.** Annotation of the major cross-peaks in HSQC NMR spectra of the cloudberry leaf extract fractions F2-F4.

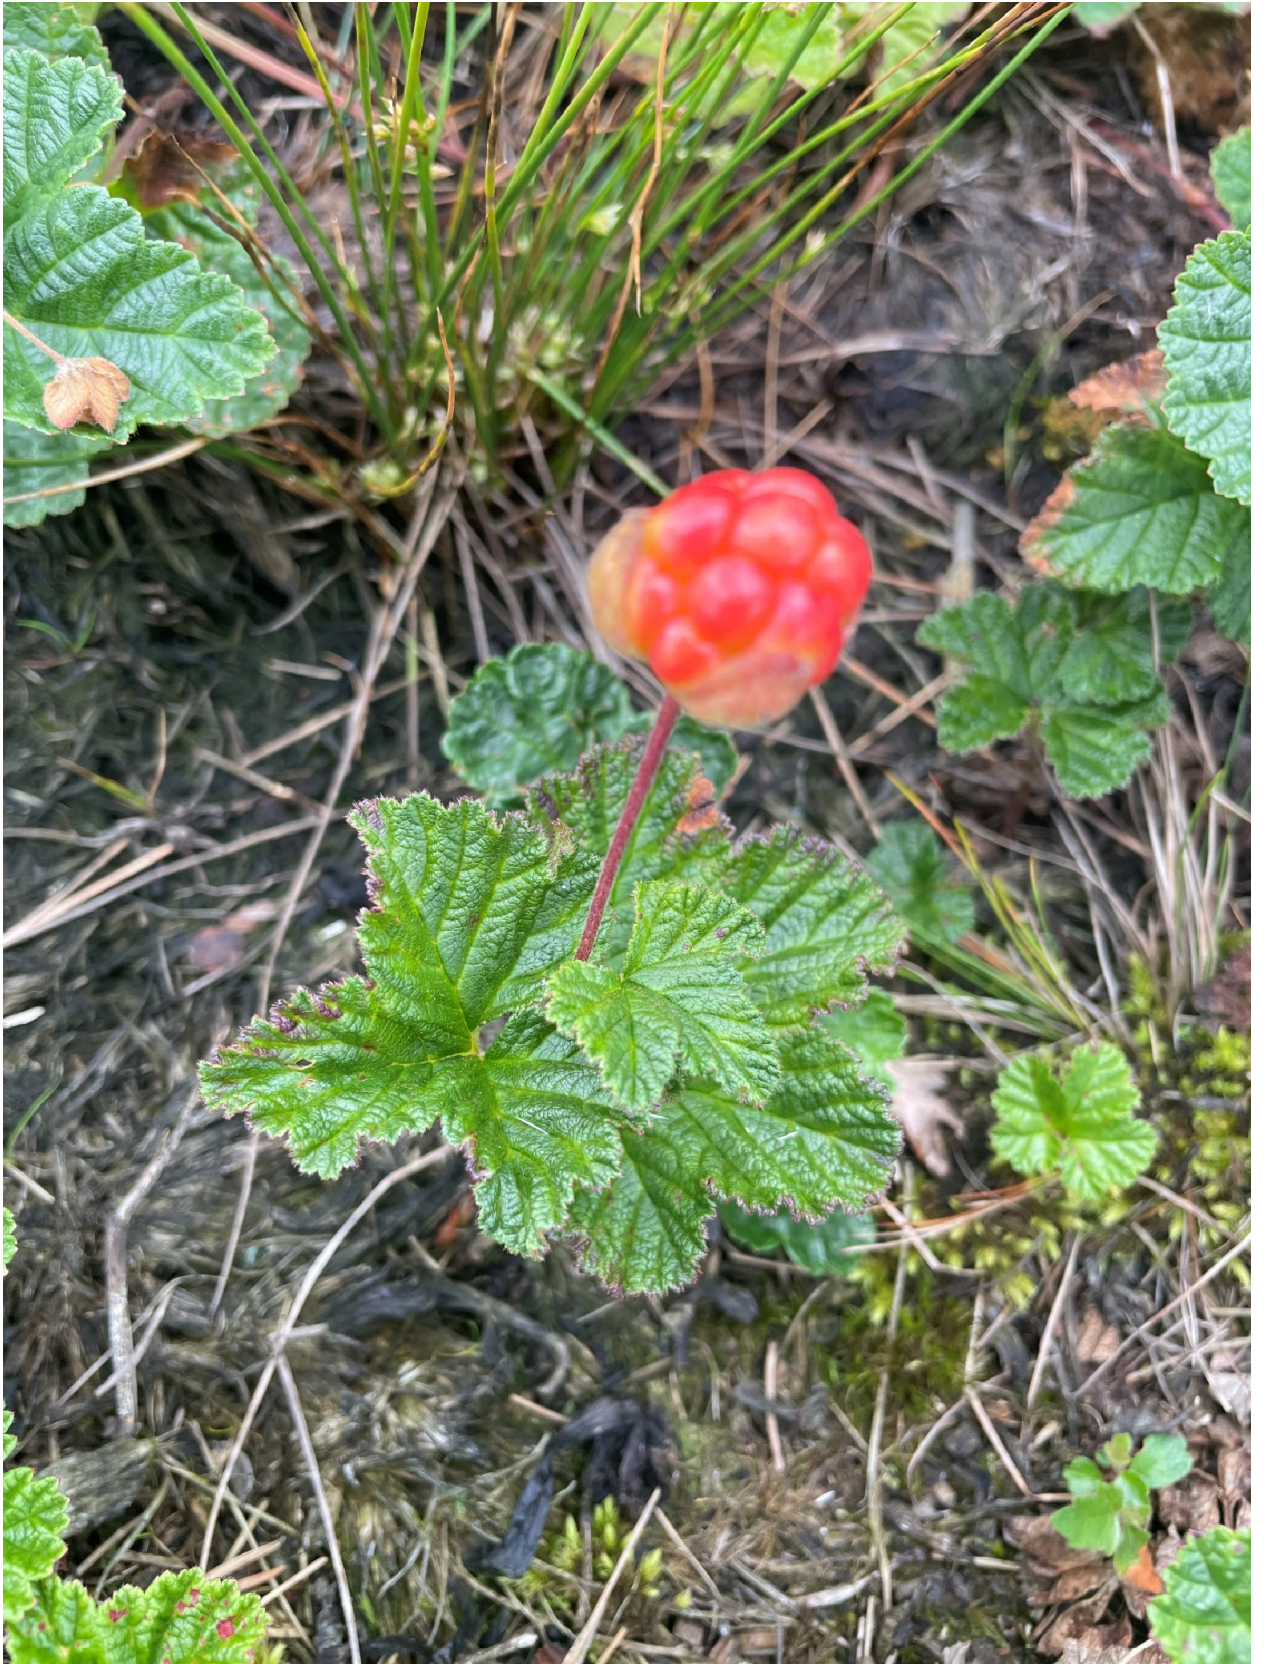

**Figure S1.** A cloudberry (*Rubus chamaemorus* L.) plant at the collection site.

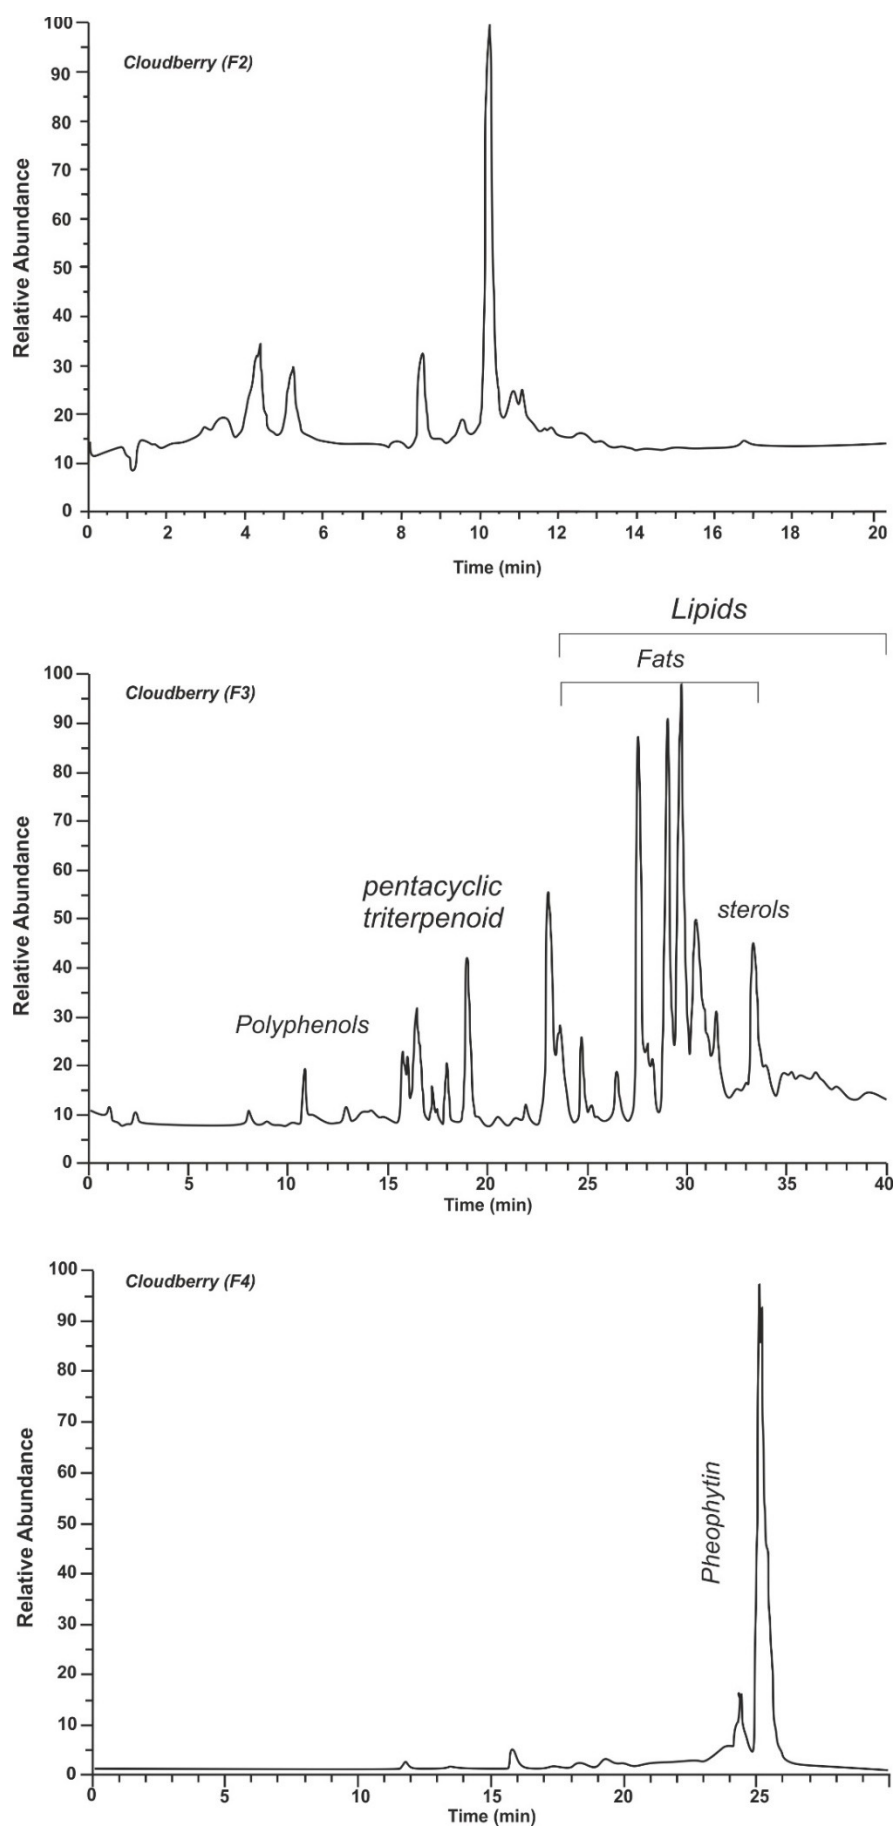

**Figure S2.** HPLC-HRMS chromatograms (total ion current) of the cloudberry leaf extract fractions F2-F4.

**Table S1.** Annotation of the major cross-peaks in HSQC NMR spectra of the cloudberry leaf extract fractions F2-F4.

| Name of compounds                             | Characteristic NMR peaks, ppm ( $\delta C/\delta H$ )                                                                 |
|-----------------------------------------------|-----------------------------------------------------------------------------------------------------------------------|
| F2 (DMSO- $d_6$ )                             |                                                                                                                       |
| Miquelianin                                   | 116.50/7.81; 121.13/7.52; 93.41/6.41; 98.58/6.21; 101.35/5.43                                                         |
| Procyanidin/Catechin                          | 115.17/6.84; 118.10/6.65; 94.97/5.89; 95.58/5.67;<br>77.95/4.73; 64.94/4.05; 28.96/2.75-2.53                          |
| Carbohydrates                                 | 92.37/4.91; 96.77/4.27; 75.18/3.51; 71.49/3.33; 73.76/3.28; 76.31/3.28; 70.13/3.04;<br>60.89/3.66-3.44                |
| Ellagitannins                                 | 109.05/7.05                                                                                                           |
| Cinnamic acid:                                |                                                                                                                       |
| - Caffeic acid                                | 114.84/7.05; 121.35/7.01; 113.77/6.26; 145.20/7.47                                                                    |
| - Ferulic acid                                | 110.61/7.33; 123.10/7.11; 145.36/7.55; 114.59/6.39                                                                    |
| - Sinapic acid                                | 106.16/7.03; 145.36/7.55; 114.59/6.39                                                                                 |
| - <i>p</i> -coumaric acid                     | 127.91/7.35; 145.36/7.55; 114.59/6.39                                                                                 |
| OMe-groups                                    | 55.49/3.74                                                                                                            |
| F3 (DMSO- $d_6$ )                             |                                                                                                                       |
| Procyanidin                                   | 114.63-115.36/6.84-6.78                                                                                               |
| Carbohydrates                                 | 99.12/4.68; 103.47/4.10; 77.54/3.16; 73.07/3.28; 72.75/3.56; 60.12/3.51-3.46                                          |
| Triacylglyceride<br>(unsaturated fatty acids) | 69.67/5.10; 61.97/4.31-4.12;<br>(127.53/5.31; 25.04/2.76; 33.24/2.26; 24.15/1.49; 28.67/1.23; 21.78/1.25; 13.63/0.84) |
| Pentacyclic triterpenic<br>acids              | 126.73/5.18; 53.40/2.37; 24.96/2.49; 46.66/1.66; 40.97/1.40-1.13; 54.88/0.76; 26.23/1.08;<br>16.96/0.67               |
| Carotenoids                                   | 137.21/6.38; 132.67/6.32; 145.82/5.84; 130.40/6.16; 11.63/1.97                                                        |
| OMe groups                                    | 55.41/3.74                                                                                                            |
| F4 (CDCl- $d_1$ )                             |                                                                                                                       |
| Acylglycerides<br>(unsaturated fatty acids)   | 68.16/5.28; 61.37/4.31-4.16;<br>(127.44/5.37; 24.91/2.82; 33.68/2.31; 24.26/1.62; 28.49/1.32; 21.99/1.30; 13.66/0.89) |
| Sitosterol-like compounds                     | 11.10/0.69; 11.19/0.86; 41.46/2.30-2.24; 45.19/0.94; 49.37/0.95; 55.23/1.11; 56.07/1.01;<br>70.93/3.52 121.3/5.37;    |
| Pheophytin                                    | 10.95/3.34; 12.04/3.69; 64.06/6.28; 93.34/8.81; 99.88/9.78; 106.40/10.01; 124.9/6.27;<br>127.47/7.87                  |
